# Supplementary material for: Tripartite-motif family genes associated with cancer stem cells affect tumor progression and can assist in the clinical prognosis of kidney renal clear cell carcinoma
Source: PubMed Central journal article supplement (PMC7646106; doi:10.7150/ijms.51260), 2020-10-18
Supplement: ijmsv17p2905s1.pdf [file ijmsv17p2905s1.pdf]

1 **Supplementary materials**

2 **Figure S1:** Random sampling validation. (A) Based on this risk model, 218 patients  
3 with KIRC randomly sampled from TCGA database were divided into high- and  
4 low-risk groups, and the corresponding survival curves were drawn. (B) Five-year  
5 ROC curve. (C) Seven-year ROC curve. (D) Heatmap. The previous correlation  
6 analysis with clinicopathological characteristics based on the risk model. (E)  
7 Univariate Cox analysis. (F) Multivariate Cox analysis. \*P < 0.05 and \*\*\*P < 0.001.  
8

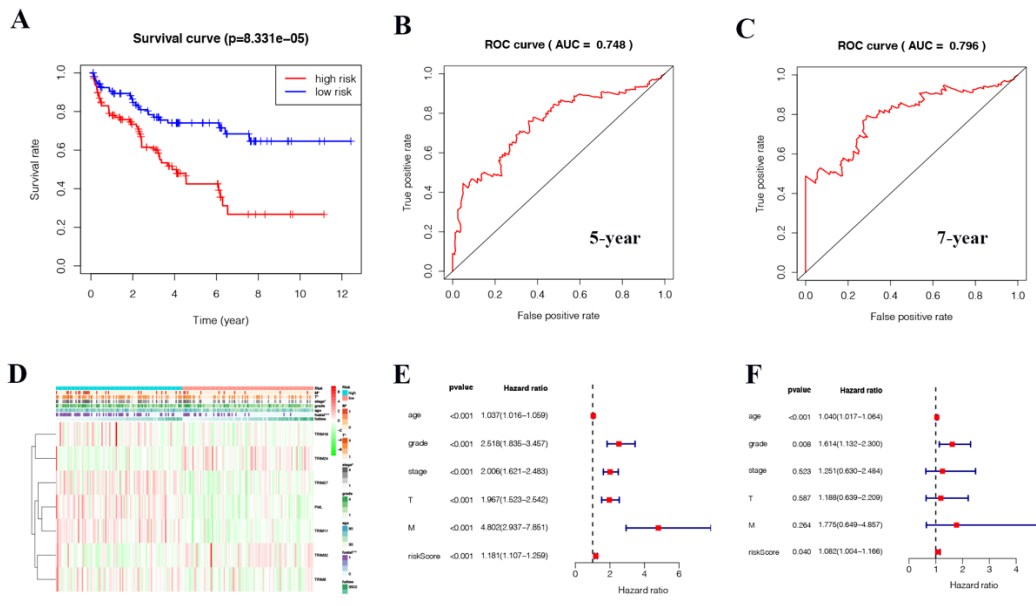

**Figure S1**
